1 **Title**

2

3 Gene-regulatory independent functions for insect DNA methylation

4

5 **Short Title**

6

7 Functional DNA methylation in an insect

8

9 **Authors**

10

11 Adam J. Bewick<sup>1</sup>, Zachary Sanchez<sup>2</sup>, Elizabeth C. Mckinney<sup>2</sup>, Allen J. Moore<sup>2</sup>, Patricia

12 J. Moore<sup>2\*</sup>, Robert J. Schmitz<sup>1\*</sup>

13

14 **Affiliations**

15

16 <sup>1</sup>Department of Genetics, University of Georgia, Athens, GA 30602, USA

17 <sup>2</sup>Department of Entomology, University of Georgia, Athens, GA 30602, USA

18

19 **Corresponding Authors**

20

21 E-mail: [\\*pjmoore@uga.edu](mailto:pjmoore@uga.edu) (PJM); [\\*schmitz@uga.edu](mailto:schmitz@uga.edu) (RJS)

## 22 **Abstract**

23

24         The function of cytosine (DNA) methylation in insects remains unknown. Here  
25 we provide evidence for the functional role of the maintenance DNA methyltransferase 1  
26 (*Dnmt1*) in an insect using experimental manipulation. Through RNA interference  
27 (RNAi) we successfully post-transcriptionally knocked down *Dnmt1* in ovarian tissue of  
28 the hemipteran *Oncopeltus fasciatus* (the large milkweed bug). Individuals depleted for  
29 *Dnmt1*, and subsequently DNA methylation, failed to reproduce. Eggs were inviable and  
30 declined in number, and nuclei structure of follicular epithelium was aberrant. Depletion  
31 of DNA methylation did not result in changes in gene or transposable element expression  
32 revealing an important function of DNA methylation seemingly not contingent on gene  
33 expression. Our work provides direct experimental evidence for a functional role of  
34 *Dnmt1* and DNA methylation independent of gene expression in insects.

35

## 36 **Introduction**

37

38         DNA methylation in insects has been hypothesized to play numerous functional  
39 roles including polyphenism, diapause, longevity, and social behavior and caste  
40 differentiation [1–21]. However, these hypotheses are based primarily on correlational  
41 studies; for example, there is evidence that the dependence of social behavior and caste  
42 differentiation on DNA methylation is not absolute [11–13]. Comparative epigenomic  
43 studies have provided valuable insights into patterns of DNA methylation across most  
44 insects, but have offered limited insights into its functional significance.

45 In animals DNA methylation typically occurs at CG sites, which is established by  
46 DNA methyltransferase 3 (*Dnmt3*), and subsequently maintained by DNA  
47 methyltransferase 1 (*Dnmt1*). Many insects possess *Dnmt1* and *Dnmt3*; however, there is  
48 variation in presence-absence and copy number of these DNA methyltransferases, and  
49 levels and patterns of DNA methylation [12, 13]. In many insects DNA methylation is  
50 localized to moderately and constitutively expressed genes that are highly conserved  
51 between species. This has led some to the hypothesis that DNA methylation functions in  
52 transcriptional regulation [6, 15, 22, 23]. However, functional tests of DNA  
53 methyltransferases in insects are limited to the post-transcriptional knock down of *Dnmt3*  
54 in *Apis mellifera*, which is associated with modest reductions in DNA methylation,  
55 differential gene expression, and alternative splicing [24]. Given the variation in  
56 mechanisms that establish and maintain DNA methylation and limited genetic and mutant  
57 studies, the function of insect DNA methyltransferases, and DNA methylation itself, is  
58 obscure.

59 Here we show that DNA methylation is maintained by *Dnmt1*, is essential and is  
60 not associated with transcription in the hemipteran *Oncopeltus fasciatus* (the large  
61 milkweed bug) [25, 26]. Post-transcriptional knockdown of *Dnmt1* led to reduced egg  
62 viability, fecundity, and aberrant follicular epithelium, and thus failure to produce a  
63 successive generation. Despite finding levels of methylated CG (mCG) within coding  
64 regions reduced by 83.55%, we found no evidence for DNA methylation directly  
65 affecting transcription. Our results suggest *Dnmt1* plays an important role in reproduction  
66 in *O. fasciatus* that is mediated by a gene-regulatory independent function of DNA  
67 methylation. *Oncopeltus fasciatus* represents a fruitful model species for functional

68 studies of DNA methylation, and continuation of studies in this system will unravel the  
69 insect epigenome and its functional consequences.

70

## 71 **Results**

72

73 ***Dnmt1* is necessary for reproduction.** To assess the function of *Dnmt1*, double-stranded  
74 RNA (dsRNA) targeting *Dnmt1* (*ds-dnmt1*) (S1 Fig, and S1 and S2 Tables) was injected  
75 between the abdominal sternites of virgin *O. fasciatus* females. Maternal dsRNA  
76 injection has been used in *O. fasciatus* to post-transcriptionally knockdown expression in  
77 embryos developing from eggs laid by injected females [27] and is known to reduce  
78 expression of embryonically expressed genes. A control injection of double-stranded *Red*  
79 (*ds-red*) or buffer was used to confirm that there was no technical affect associated with  
80 RNAi treatment. The effects of RNAi treatment on gene expression was assessed in gut,  
81 head, thorax and ovary tissues 10 days after mating to untreated *O. fasciatus* males. The  
82 post-transcriptional knockdown reduced *dnmt1* mRNA expression in all examined tissues  
83 (Fig 1A, and S2 Fig and S2 Table). Moreover, there was little variation in expression  
84 between biological replicates in *ds-dnmt1*-injected and control individuals (Fig 1A).  
85 Taken together, treatment with *ds-dnmt1* specifically and reliably knocked down *Dnmt1*  
86 transcripts.

87

88 **Fig. 1. *Dnmt1* is required for reproduction in *O. fasciatus*.** (A) Assessment of RNAi  
89 treatment targeting *Dnmt1* using qRT-PCR demonstrates successful reduction in  
90 transcription in ovaries compared to control. Dots indicate mean expression level, and



91 error bars indicate standard error of the mean. (B) Parental RNAi injection with *ds-dnmt1*  
92 significantly affected the development of eggs laid by injected females compared to eggs  
93 laid by control females. Dots indicate mean expression level, and error bars indicate  
94 standard error of the mean. (C) Whole ovaries from females removed 12-14 days post-  
95 injection (i and ii). In control females (i), mature oocytes can be seen collecting in the  
96 lateral oviduct (Od). In *ds-dnmt1* females (ii), no mature oocytes are apparent, but the  
97 oviduct has filled with a yolk-like substance. Scale bar equals 1 mm in (i) and (ii). High  
98 magnification of the follicular epithelium surrounding a maturing oocyte (iii and iv).  
99 Nuclei are stained with Hoechst 33258 and artificially colored turquoise. Nuclei from  
100 control follicular epithelium (iii) are round and regular in shape. Nuclei from *ds-dnmt1*  
101 females (iv) are highly irregular in shape.

102

103 Post-transcriptional knockdown of *Dnmt1* affects egg development and viability.  
104 In the early stages following injection, females injected with *ds-dnmt1* did not lay fewer  
105 eggs ( $F = 2.91$ ,  $df = 1$ ;  $p = 1.1e-01$ ) (S3 Fig). Although eggs laid by females injected with  
106 *ds-dnmt1* within the first 8 days post-injection looked typical, they were significantly less  
107 likely to develop than the eggs laid by control females ( $\chi^2 = 8.470$ ;  $df = 1$ ;  $p = 4.0e-03$ ).  
108 Furthermore, a mean of 93% of the eggs laid by control females initiated development  
109 whereas only a mean of 4% of the eggs laid by *ds-dnmt1* females initiated development  
110 (Fig 1B). Although eggs laid by the control females that initiated development were  
111 viable and hatched, the few eggs laid by *ds-dnmt1*-injected females that initiated  
112 development were not viable and failed to hatch.

113 Post-transcriptional knockdown of *Dnmt1* affects egg production following the  
114 first 10-day post-injection. By 10 to 12 days, females injected with ds-*dnmt1* have mainly  
115 stopped laying eggs. While ovaries dissected from control females at this stage have  
116 intact eggs in the oviduct, the oviducts of ds-*dnmt1*-injected females are either empty or  
117 filled with a mass of what appears to be yolk (Fig 1C), indicating a fault in production of  
118 a functional chorion. Analysis of ovarian cell structure indicates that knockdown of  
119 *Dnmt1* transcripts affects the cell structure of the follicular epithelium, which is  
120 responsible for production of the chorion and vitelline envelope. Nuclei of the follicular  
121 epithelium in *Dnmt1* post-transcriptional knock downed females are aberrant and fewer  
122 in number than that of the control females (Fig 1C). Therefore, both through disruption of  
123 embryonic development from eggs produced within a week of injection and cessation of  
124 egg production, reproduction is compromised following knockdown of *Dnmt1*  
125 transcripts, preventing a successive generation.

126

127 **Post-transcriptional knock down of *Dnmt1* successfully and severely reduces mCG**  
128 **in ovaries.** The successful knockdown of *Dnmt1* transcripts in gut, head, thorax and  
129 ovaries prompted the evaluation of the consequences on DNA methylation using whole  
130 genome bisulfite sequencing (WGBS). We used a low coverage sequencing approach,  
131 which is sufficient for the detection of changes in bulk levels of DNA methylation [28].  
132 Although *Dnmt1* mRNA expression was reduced in all tissues, DNA methylation was  
133 only reduced in ovary tissue (Fig 2A–C and S2 Fig). The reduction specifically in ovaries  
134 is likely due to the higher rate of cell division in comparison to cells in other tissues

135 surveyed, which would facilitate the passive loss of DNA methylation in the absence  
136 of *Dnmt1*.

137

138 **Fig. 2. *Dnmt1* is required for mCG in *O. fasciatus*.** (A) Level and genomic location of  
139 mCG between hemi- and holometabolous insects, and *D. pulex*, and RNAi treatment  
140 targeting *Dnmt1* in *O. fasciatus*. (B) Levels of mCG across gene bodies and one kilobase  
141 pairs (1kb) flanking sequence of hemi- and holometabolous insects, and *D. pulex*. Also  
142 shown are the levels of mCG across gene bodies for *O. fasciatus ds-dnmt1*. (C) Density  
143 plot representation of mCG for RNAi treated *O. fasciatus* and species investigated in this  
144 study.

145

146 High coverage single-base resolution DNA methylomes from *ds-dnmt1* and  
147 control ovaries were generated to understand the impact of the loss of *Dnmt1*. Greater  
148 than 75% reductions of mCG were observed across the genome, consistent with the  
149 decrease observed in the low coverage experiments (S2 Fig). The presence of  
150 symmetrical mCG – DNA methylation occurring on both DNA strands at a CpG site – is  
151 indicative of the presence of a functional *Dnmt1*. In control individuals methylation at  
152 CpGs is highly symmetrical and highly methylated. However, even though knockdown of  
153 *Dnmt1* significantly reduces methylation in ovaries, a minority of CpG sites remain  
154 symmetrically methylated (Fig 2C). This suggests that there are some cells within ovaries  
155 that have wild-type methylomes. The lack of a complete loss of mCG is expected due to  
156 the injection of fully developed individuals and hence the presence of fully methylated  
157 genomes that existed prior to the injection of dsRNA.

158 **Comparative epigenomic analysis of the *O. fasciatus* methylome with other insects.**

159 The *O. fasciatus* methylome revealed much higher levels of mCG throughout the  
160 genome, similar to other hemimetabolous insects, when compared to holometabolous  
161 insects (Fig 2A and B). DNA methylation of gene bodies is found in *O. fasciatus* similar  
162 to other insects that possess DNA methylation, however, the pattern of mCG within  
163 exonic regions of hemi- and holometabolous insects is distinct (Fig 2B). Higher levels of  
164 mCG are towards the 5' end compared to the 3' end of coding regions in holometabolous  
165 insects. This distribution resembles the most recent common ancestor of all insects  
166 (crustaceans) represented by *Daphnia pulex*. Hemimetabolous insects, which include *O.*  
167 *fasciatus*, have a more uniform distribution of mCG across coding regions, and higher  
168 levels towards the 3' end of coding regions. Previous studies have demonstrated that CG-  
169 methylated genes are often conserved within insects. We identified 39.31% (N = 7,561)  
170 CG-methylated genes in *O. fasciatus* and 85.99% of these are CG-methylated in at least  
171 one other insect species investigated (S3 Table). Therefore, even though the pattern of  
172 DNA methylation within gene bodies of hemimetabolous insects is distinct compared to  
173 holometabolous insects, the targeting of specific genes is conserved. Thus, the reductions  
174 of mCG across gene bodies in *ds-dnmt1* individuals provides an opportunity to study its  
175 potential function.

176

177 **Decreased levels of mCG are not associated with transcriptome-wide changes in**  
178 **gene or transposable element expression in ovaries.** We performed RNA-seq analysis  
179 from ovary and other tissues in *ds-dnmt1* and control individuals to better understand the  
180 relationship between gene expression and DNA methylation. No relationship between

181 discrete mCG levels and gene expression was observed and this was consistent in other  
182 insects that we investigated (Fig 3A, and S4 Fig and S4–7 Tables). Furthermore, no  
183 correlation between continuous mCG levels and gene expression was observed (Fig 3B,  
184 and S4 Fig and S4–7 Tables). Interestingly, genome-wide relationships between DNA  
185 methylation and gene expression were not impacted by the knockdown of *Dnmt1*  
186 transcripts (Fig 3B).

187

188 **Fig. 3. Loss of mCG in *O. fasciatus* ovaries has a limited effect on transcription.** (A)

189 Gene expression level for deciles of increasing mCG (1–10) and unmethylated genes  
190 (UM). Error bars represent 95% confidence interval of the mean. (B) Regression of gene

191 expression against a continuous measure of mCG with > 0 FPKM for the same set of  
192 genes that are CG-methylated in *O. fasciatus* control, but unmethylated in *ds-dnmt1*. Raw  
193 *p* values are provided for each regression, and significance or non-significance (NS) is

194 indicated in brackets following Bonferroni correction. (C) Combinational overlap of  
195 genes that are differential CG-methylated and expressed, and similarly CG-methylated  
196 and expressed between *O. fasciatus ds-dnmt1* and control. Gene groups: Differentially

197 Methylated Gene (DMG), Differentially Expressed Gene (DEG), Similarly Methylated  
198 Gene (SMG)/UnMethylated Genes (UMG), and non-Differentially Expressed Gene (non-  
199 DEG).

200 (D) A heatmap showing gene expression changes for genes that are differentially  
201 CG-methylated between *O. fasciatus ds-dnmt1* and control. Expression was standardized  
202 by the highest value per gene per biological replicate to produce a Relative Fragments Per  
203 Kilobase of transcript per Million (RFPKM) value. RFPKM were clustered using a  
hierarchical clustering method.

204 A maximum of 264 differentially expressed genes (DEG) were observed between  
205 *O. fasciatus* ds-*dnmt1* and control ovaries (S5 Table). *Dnmt1* was down-regulated in all  
206 ds-*dnmt1* samples and no detection of the *de novo* DNA methyltransferase *Dnmt3* was  
207 observed. Additionally, no DEGs are observed between *O. fasciatus* ds-*dnmt1* and  
208 control for gut, head and thorax (S8 Table). Of genes with differences in DNA  
209 methylation between ds-*dnmt1* and control ovaries (N = 6,590), the majority (N = 6,484;  
210 98.39%) had no changes to gene expression (Fig 3C, and S4 and S5 Tables).  
211 Furthermore, mCG was always reduced in ds-*dnmt1* compared to control ovaries in the  
212 6,484 gene set. Despite genes being unmethylated (UM) in ds-*dnmt1* ovaries, changes to  
213 gene expression occurred in both directions for the 106 differentially DNA methylated  
214 and expressed genes (Fig 3D). Even for genes that by definition are unmethylated (N =  
215 5,982) or similarly CG-methylated (N = 21) in ds-*dnmt1* and control, a similar proportion  
216 (N = 6,003; 97.53%) was observed to have no difference in gene expression. The lack of  
217 an association between DNA methylation and gene expression is further supported when  
218 applying more stringent thresholds to the definition of CG-methylated and unmethylated  
219 genes (S5 Fig). Our observations support a trivial role of DNA methylation in gene  
220 expression if any at all.

221 The function of DNA methylation in *O. fasciatus* might lie within genome  
222 defense – the transcriptional regulation of repetitive DNA and transposons – as its  
223 genome is composed of a nontrivial amount of repetitive DNA and transposons (6.21%)  
224 (S9 Table). However, as in genes, reduction of mCG in ds-*dnmt1* compared to control  
225 ovaries was found across the bodies of the TEs, and were not associated with a genome-

226 wide increase in expression (Fig 4A–C, and S6 Fig and S10 Table). This further supports  
227 a trivial role of DNA methylation in transcriptional regulation of loci.

228

229 **Fig. 4. Large-scale reactivation of TEs did not follow severe reductions of mCG in**

230 *O. fasciatus* ovaries. (A) CG methylation levels for the top ten most abundant TEs of  $\geq$

231 500 bp in the *O. fasciatus* genome. The dashed lines correspond to the intergenic mCG

232 level of *O. fasciatus* ds-*dnmt1* and control. (B) Levels of mCG across the bodies and 1kb

233 flanking sequence of TEs for a single representative of DNA transposons (Chapaev),

234 LTR retrotransposons (Gypsy), and non-LTR retrotransposons (Jockey). (C) Expression

235 quantified as RPKM for the top ten most abundant TEs of  $\geq$  500 bp. The subset presents

236 the RPKM distribution when all TEs are considered within ds-*dnmt1* and control ovaries.

237

238 **Discussion**

239

240 DNA methylation has been implicated to play numerous roles in insects [1–21],

241 however, its exact function remains uncertain. In this study we observed that post-

242 transcriptional knockdown of *Dnmt1* negatively impacts reproduction through a decrease

243 in egg development and egg production in *O. fasciatus*.

244 Post-transcriptional knockdown of *Dnmt1* transcripts impacted the maternal

245 somatic gonad and egg maturation. The follicular epithelial cells undergo multiple rounds

246 of mitosis during oogenesis [29]. Oocytes that were in the early stages of maturation

247 would be the most effected, as their follicular epithelium would passively lose DNA

248 methylation with each successive round of mitosis. Loss was not compensated by the *de*

249 *novo* DNA methyltransferase *Dnmt3* as expression was not observed in ovaries. The loss  
250 of function of follicular epithelial cells, which includes production of the chorion and  
251 vitelline membrane, could explain the loss of oocyte integrity.

252 The knockdown of *Dnmt1* transcripts in *O. fasciatus* ovaries subsequently did not  
253 lead to transcriptome-wide changes in gene expression. No correlation between mCG and  
254 gene expression in *O. fasciatus* ovaries and other insects was observed (Fig 3 and S4 Fig)  
255 [6, 13]. Hence, the importance of mCG in *O. fasciatus* might lie within the orchestration  
256 of genomic structure during cell replication, gametogenesis, or cell types not examined in  
257 our study.

258 DNA methylation might be required for proper mitosis, and the segregation of sister  
259 chromatids into their respective daughter cells, as there does appear to be aberrant nuclei  
260 structure in *ds-dnmt1* compared to control ovarian cells (Fig. 1C). This phenotype could  
261 be the result of epigenomic defects in scaffold/matrix attachment regions (S/MAR), as  
262 some correlate with origins of replication [30]. This phenotype could be exacerbated by  
263 multiple mitotic divisions of follicular epithelial cells during oogenesis, and/or the  
264 presence of holocentric chromosomes [31]. Future work describing the epigenomic  
265 contributions to cellular defects are now possible to study in this newly emerging and  
266 tractable model species, *O. fasciatus*.

267 We suggest that DNA methylation is more important for genome structure,  
268 integrity or other cellular processes than it is for somatic expression in *O. fasciatus*.  
269 Although it is possible that DNA methylation is important for expression control in a rare  
270 cell type that was not examined in our study, we instead propose that regulation of  
271 expression is not likely the primary role in insects. Investigating the importance of DNA



272 methylation prior to the onset of meiosis and throughout embryo development is a  
273 fundamental next-step. *Oncopeltus fasciatus* represents a fruitful model species for  
274 functional studies of DNA methylation, and continuation of studies in this system will  
275 unravel the insect epigenome and its functional consequences.

276

## 277 **Materials and Methods**

278

279 **Phylogenetic analysis.** A subset of DNA methyltransferase (*Dnmt*) 1, 2, and 3 sequences  
280 was obtained from [16] for phylogenetic analysis. The subset included only insect species  
281 with available MethylC-seq data, and species representatives from the dipteran suborders  
282 Brachycera and Nematocera: *Acyrtosiphon pisum*, *Aedes aegypti*, *Aedes albopictus*,  
283 *Anopheles gambiae*, *Apis mellifera*, *Bombyx mori*, *Camponotus floridanus*, *Copidosoma*  
284 *floridanum*, *Culex pipiens quinquefasciatus*, *Drosophila melanogaster*, *Harpegnathos*  
285 *saltator*, *Microplitis demolitor*, *Nasonia vitripennis*, *Nicrophorus vespilloides*, *O.*  
286 *fasciatus*, *Ooceraea (Cerapachys) biroi*, *Polistes canadensis*, *Polistes dominula*,  
287 *Solenopsis invicta*, *Tribolium castaneum*, and *Zootermopsis nevadensis*. DNA  
288 methyltransferases were reassessed in *O. fasciatus* by using InterProScan v5.23-62.0 [32]  
289 to identify annotated proteins with a C-5 cytosine-specific DNA methylase domain  
290 (PF00145). Sequence identifiers are located in S1 Fig. Full-length protein sequences were  
291 aligned using PASTA v1.6.4 [33], and manually trimmed of divergent, non-homologous  
292 sequence in Mesquite v3.2 [34]. Full, aligned, and aligned and trimmed sequence  
293 alignments, and parenthetical phylogenetic tree are located in S1 Data. Phylogenetic  
294 relationship among *Dnmt* sequences was estimated using BEAST v2.3.2 [35] with a

295 Blosum62+ $\Gamma$  model of amino acid substitution. A Markov Chain Monte Carlo (MCMC)  
296 was ran until stationarity and convergence was reached (10,000,000 iterations), and a  
297 burnin of 1,000,000 was used prior to summarizing the posterior distribution of tree  
298 topologies. A consensus tree was generated using TreeAnnotator v2.3.2, visualized in  
299 FigTree v1.4.2 (<http://tree.bio.ed.ac.uk/software/figtree/>) and exported for stylization in  
300 Affinity Designer v1.5.1 (<https://affinity.serif.com/en-us/>).

301

302 **PCR confirmation for the presence of a single *Dnmt1* ortholog in *O. fasciatus*.** To  
303 determine if OFAS015351 and OFAS018396 were two parts of a single *Dnmt1* ortholog,  
304 we designed one sense primer at the 3' end of OFAS015351 (Of\_DMNT1-1\_3603S; S1  
305 Table) and two antisense primers at the 3' end of OFAS018396 (Of\_DNMT1-2\_424A  
306 and Of\_DNMT1-2\_465A; S1 Table). A fourth sense primer (Of\_DNMT1-2\_1S; S1  
307 Table) was designed at the 5' end of OFAS018396 to confirm the size and sequence of  
308 this possibly truncated gene annotation.

309 Polymerase Chain Reaction (PCR) with primer combinations Of\_DMNT1-  
310 1\_3603S–Of\_DNMT1-2\_424A, Of\_DMNT1-1\_3603S–Of\_DNMT1-2\_465A, and  
311 Of\_DNMT1-2\_1S–Of\_DNMT1-2\_424A was performed using Q5 Polymerase (New  
312 England BioLabs, Ipswich, MA) per manufactures instructions. Thermacycler conditions  
313 were 98°C for 15 seconds (s) (denaturing), 60°C for 30 s (annealing), and 72°C for 30 s  
314 (extension), and repeated for 40 cycles. The PCR products were then purified using  
315 QIAquick PCR Purification Kit (Qiagen, Venlo, The Netherlands), and sequenced at the  
316 Georgia Genomics and Bioinformatics Core (Athens, GA).

317

318 **Animal culture.** *Oncopeltus fasciatus* cultures were originally purchased from Carolina  
319 Biologicals (Burlington, NC). Mass colonies were maintained in incubators under a 12  
320 h:12 h light/dark cycle at 27°C. Colonies and individual experimental animals were fed  
321 organic raw sunflower seeds and provided with *ad libitum* deionized water. Late instar  
322 nymphs were separated from the mass colonies and housed under the same conditions.  
323 Nymph colonies were checked daily for newly emerged adults. Adults were separated by  
324 sex and kept with food and water for 7–10 days until females reached sexual maturity.

325

326 **Parental RNAi.** Template for the *in vitro* transcription of reactions was prepared from a  
327 PCR reaction in which T7 phage promoter sequences were added to the gene-specific  
328 *Dnmt1* primers [36]. For our control sequence, we used the red fluorescent protein (*Red*)  
329 sequence used in previous parental RNAi experiments in *O. fasciatus* [36] or buffer.  
330 Primer sequences can be found in S2 Table. Sense and anti-sense RNA was synthesized  
331 in a single reaction using the Ambion MEGAscript kit (ThermoFisher Sci, Waltham,  
332 MA). After purification, the double-stranded RNA (dsRNA) concentration was adjusted  
333 to 2 µg/µL in injection buffer (5 mM KCl, 0.1 mM NaH<sub>2</sub>PO<sub>4</sub>) [36]. Females were  
334 injected with 5 µL of dsRNA between the abdominal sternites using an insulin syringe.  
335 Following injection, females were paired with an un-injected male to stimulate  
336 oviposition and fertilize eggs. Individual females with their mate were housed in petri  
337 dishes with sunflower seeds, water and cotton wool as an oviposition site. The parental  
338 RNAi protocol has been reported to result in 100% penetrance by the third clutch of eggs  
339 [36] and this was also our experience.

340

341 **Reproductive phenotype screening and analysis.** Eggs were collected between days 4–  
342 10 post-injection and assessed for development. *Oncopeltus fasciatus* embryos change  
343 from a creamy white color to orange as they develop, which indicates viability. Thus,  
344 color change is a useful tool for assessing healthy development. We examined the  
345 number of developing eggs at 5 days post-oviposition, at which point viable eggs are  
346 clearly distinguishable from inviable eggs, as well as hatching rate of eggs from females  
347 injected with double-stranded *Dnmt1* (*ds-dnmt1*) and double-stranded *Red* (*ds-red*). The  
348 data for the number of eggs laid was normally distributed so differences among RNAi  
349 treated groups were tested using analysis of variance (ANOVA). The development data,  
350 however, was not normally distributed and consisted of binary states (developed and not  
351 developed), and so differences among treatment groups were analyzed with a Generalized  
352 Linear Model (GLM) using a Poisson distribution.

353 A second set of *O. fasciatus* females were injected in the same manner as  
354 described in **Parental RNAi** to assess post-transcriptional knockdown of *Dnmt1* on  
355 ovarian structure. *Oncopeltus fasciatus* females were dissected 10 days after injection. By  
356 10 days post-injection *O. fasciatus* females are beginning to stop laying recognizable  
357 eggs. Ovaries were removed from *O. fasciatus* females and placed in 1× PBS. Whole  
358 ovaries were imaged with a Leica DFC295 stereomicroscope using Leica Application  
359 Suite morphometric software (LAS V4.1; Leica, Wetzlar, Germany). Dissected ovaries  
360 were fixed within 15 minutes of dissection in 4% formaldehyde in 1× PBS for 25  
361 minutes. Fixed ovaries were stained with Hoechst 33342 (Sigma Aldrich) at 0.5 µg/ml.  
362 The stained ovarioles were imaged using a Zeiss LSM 710 Confocal Microscope (Zeiss)  
363 at the University of Georgia Biomedical Microscopy Core.

364 **Quantitative RT-PCR.** To assess the effectiveness of post-transcriptional knockdown of  
365 *Dnmt1*, females were dissected 11 days post-injection. Ovaries were removed from each  
366 female, flash frozen in liquid nitrogen and stored at -80°C until processing. Total RNA  
367 (and DNA) was extracted from a single ovary per female using a Qiagen Allprep  
368 DNA/RNA Mini Kit (Qiagen, Venlo, The Netherlands) per manufacturer's instructions.  
369 Complementary DNA (cDNA) was synthesized from 500 ng RNA with qScript cDNA  
370 SuperMix (Quanta Biosciences, Gaithersburg, MD).

371 Expression level of *Dnmt1* was quantified by quantitative real-time PCR (qRT-  
372 PCR). Primers were designed for *Dnmt1* using the *O. fasciatus* genome as a reference  
373 [37]. Actin and GAPDH were used as endogenous reference genes. Primer sequences can  
374 be found in Extended Data Table 2. We used Roche LightCycler 480 SYBR Green  
375 Master Mix with a Roche LightCycler 480 (Roche Applied Science, Indianapolis, IN) for  
376 qRT-PCR. All samples were run with 3 technical replicates using 10 µL reactions using  
377 the manufacturer's recommended protocol. Primer efficiency calculations, genomic  
378 contamination testing and endogenous control gene selection were performed as  
379 described by [37]. We used the  $\Delta\Delta CT$  method [38] to examine differences in expression  
380 between control and ds-*dnmt1* injected females [37].

381

382 **Whole-Genome Bisulfite Sequencing (WGBS) and analysis of cytosine (DNA)**  
383 **methylation.** MethylC-seq libraries for an *O. fasciatus* ds-*dnmt1* and control individual  
384 were prepared according to the protocol described in [39] using genomic DNA extracted  
385 from ovaries (see **Materials and Methods** section **Quantitative RT-PCR**). Libraries  
386 were single-end 75 bp sequenced on an Illumina NextSeq500 machine [40, 41].

387 Unmethylated lambda phage DNA was used to as a control for sodium bisulfite  
388 conversion, and an error rate of ~0.05% was estimated. *Oncopeltus fasciatus* ds-*dnmt1*  
389 and control were sequenced to a depth of ~18× and ~21×, which corresponded to an  
390 actual mapped coverage of ~9× and ~11×, respectively. Additionally, low pass (< 1×)  
391 WGBS from gut, head, ovary, and thorax was performed for three control and ds-*dnmt1*  
392 biological replicates. *Blattella germanica* was additionally sequenced to generate equal  
393 numbers of hemi- and holometabolous insects investigated in this study. However, DNA  
394 was extracted from whole-body minus gastrointestinal tract. MethylC-seq libraries were  
395 prepared and sequenced identically to *O. fasciatus*. An error rate of ~0.14% was  
396 estimated from unmethylated lambda phage DNA. *Blattella germanica* was sequenced to  
397 a depth of ~8×, which corresponded to an actual mapped coverage of ~5×. WGBS data  
398 for *O. fasciatus* and *B. germanica* can be found on Gene Expression Omnibus (GEO)  
399 under accession GSE109199. Previously published WGBS data for *A. mellifera* [42], *Bo.*  
400 *mori* [17], *Daphnia pulex* [43], *N. vespilloides* [19], and *Z. nevadensis* [15] were  
401 downloaded from the Short Read Archive (SRA) using accessions SRR445803–4,  
402 SRR027157–9, SRR1552830, SRR2017555, and SRR3139749, respectively. Thus, DNA  
403 methylation was investigated for six insects from six different orders spread evenly  
404 across developmental groups, and a crustacean outgroup. WGBS data was aligned to each  
405 species respective genome assembly using the methylpy pipeline [44]. In brief, reads  
406 were trimmed of sequencing adapters using Cutadapt v1.9 [45], and then mapped to both  
407 a converted forward strand (cytosines to thymines) and converted reverse strand  
408 (guanines to adenines) using bowtie v1.1.1 [46]. Reads that mapped to multiple locations,  
409 and clonal reads were removed.

410           Weighted DNA methylation was calculated for CG sites by dividing the total  
411 number of aligned methylated reads by the total number of methylated plus unmethylated  
412 reads [47]. For genic metaplots, the gene body (start to stop codon), 1000 base pairs (bp)  
413 upstream, and 1000 bp downstream was divided into 20 windows proportional windows  
414 based on sequence length (bp). Weighted DNA methylation was calculated for each  
415 window and then plotted in R v3.2.4 (<https://www.r-project.org/>). CG sequence context  
416 enrichment for each gene was determined through a binomial test followed by Benjamini-  
417 Hochberg false discovery rate [48, 49]. A background mCG level was determined from  
418 all coding sequence, which was used as a threshold in determining significance with a  
419 False Discovery Rate (FDR) correction. Genes were classified as CG-methylated if they  
420 had reads mapping to at least 20 reads mapping to 20 CG sites and a  $q < 0.05$ . Using a  
421 binomial test can lead to false-negatives – highly CG-methylated genes that are classified  
422 as unmethylated (UM) – due to a low number of statistically CG-methylated sites (S4  
423 Table). Genes classified as unmethylated, but had a mCG level greater than the lowest  
424 CG-methylated gene were dropped from future analyses.

425

426 **Ortholog identification.** Best BLASTp hit (arguments: -max\_hsps 1 -max\_target\_seqs 1  
427 evalue 1e-03) was used to identify orthologs between *O. fasciatus* and other insect  
428 species investigated.

429

430 **RNA-seq and differential expression analysis.** RNA-seq libraries for RNA extracted  
431 from ovaries of three biological *O. fasciatus* ds-*dnmt1* and control replicates at 11 days  
432 post-injection were constructed using Illumina TruSeq Stranded RNA LT Kit (Illumina,

433 San Diego, CA) following the manufacturer's instructions with limited modifications.  
434 RNA from ovaries of an additional three biological *O. fasciatus* ds-*dnmt1* and control  
435 replicates, and three biological *O. fasciatus* ds-*dnmt1* and control replicates from gut,  
436 head, and thorax were extracted. The starting quantity of total RNA was adjusted to 1.3  
437  $\mu\text{g}$ , and all volumes were reduced to a third of the described quantity. Libraries were  
438 single-end 75 bp sequenced on an Illumina NextSeq500 machine. RNA-seq data for *O.*  
439 *fasciatus* ds-*dnmt1* and control can be found on GEO under accession GSE109199.  
440 Previously published RNA-seq data for *A. mellifera* [50], and *Z. nevadensis* (15) were  
441 downloaded from the SRA using accessions SRR2954345, and SRR3139740,  
442 respectively.

443 Raw RNA-seq FASTQ reads were trimmed for adapters and preprocessed to  
444 remove low-quality reads using Trimmomatic v0.33 (arguments: LEADING:10  
445 TRAILING:10 MINLEN:30) [51] prior to mapping to the *O. fasciatus* v1.1 reference  
446 genome assembly. Reads were mapped using TopHat v2.1.1 [52] supplied with a  
447 reference General Features File (GFF) to the *O. fasciatus* v1.1 reference genome  
448 assembly [26], and with the following arguments: -I 20000 --library-type fr-firststrand --  
449 b2-very-sensitive.

450 Differentially expressed genes (DEGs) between ds-*dnmt1* and control libraries  
451 were determined using edgeR v3.20.1 [53] implemented in R v3.2.4 ([https://www.r-](https://www.r-project.org/)  
452 [project.org/](https://www.r-project.org/)). Genes were retained for DEG analysis if they possessed a Counts Per  
453 Million (CPM)  $\geq 1$  in at least  $\geq 2$  libraries. Significance was determined using the  
454 glmQLFTest function, which uses empirical Bayes quasi-likelihood F-tests. Parameter  
455 settings were determined following best practices for DEG analysis as described by [54].



456 Gene expression metrics for *A. mellifera*, *Z. nevadensis*, and *O. fasciatus ds-dnmt1* and  
457 control are located in S5–8 Tables, respectively.

458

459 **Gene Ontology (GO) annotation and enrichment.** GO terms were assigned to *O.*  
460 *fasciatus* v1.1 gene set [26] through combining annotations from Blast2Go PRO v4.1.9  
461 [55], InterProScan v5.23-62.0 (arguments: -goterms -iprlookup -appl CDD,Pfam) [32],  
462 and through sequence homology to *D. melanogaster* using BLASTp (arguments: -evaluate  
463 1.0e-03 -max\_target\_seqs 1 -max\_hsps 1). 11,105/19,615 gene models were associated  
464 with at least one GO term and a total of 8,190 distinct GO identifiers were mapped. GO  
465 terms are found in S11 Table. Enriched GO terms in gene groups were evaluated using  
466 topGO v2.30.0 [56] implemented in R v3.2.4 (<https://www.r-project.org/>), and  
467 significance ( $p < 0.05$ ) of terms was assessed using Fisher's exact test with a weighted  
468 algorithm. Gene groups were contrasted to all *O. fasciatus* genes associated with GO  
469 terms (S12 Table).

470

471 **Transposable element (TE) annotation and expression.** TEs were identified using  
472 RepeatMasker v4.0.5 (<http://www.repeatmasker.org>) provided with the invertebrate  
473 repeat library from Repbase (<http://www.girinst.org/replib/>) (arguments: -lib <Repbase  
474 invertebrate library> -no\_is -engine wublast -a -inv -x -gff. Following RepeatMasker,  
475 neighboring TEs of the same type were collapsed into a single locus within the outputted  
476 GFF. The unmodified GFF is located in S9 Table.

477 To quantify expression from TEs RNA-seq libraries from *O. fasciatus ds-dnmt1*  
478 and control were independently combined and mapped to the *O. fasciatus* v1.1 reference

479 genome assembly [26] using bowtie2 v2.2.9 [57] with the following arguments: --  
480 sensitive. Mapped reads overlapping with the top ten most abundant TEs of  $\geq 500$  bp in  
481 length were identified using the *intersect* command in BEDTools suite v 2.26.0 [58]. TE  
482 expression is quantified as Reads Per Kilobase per Million mapped reads (RPKM) for  
483 each intersected TE type by counting the number reads and dividing by the mapped  
484 library read number in millions. Significance in expression of TEs between ds-*dnmt1* and  
485 control tissues was assessed using the Mann-Whitney test with the alternative hypothesis  
486 set to “greater” in R v3.2.4 (<https://www.r-project.org/>).

487

## 488 **Acknowledgements**

489

490 We thank Sam Arsenault (University of Georgia [UGA]), and Mariana Monteiro  
491 and Stefan Götz (Blast2GO Team) for assistance with Blast2GO analyses, Nick Rohr and  
492 Tina Ethridge for MethylC-Seq and RNA-seq library preparation, Brigitte Hofmeister  
493 (UGA) for bioinformatics advice, Mary Goll (UGA) for comments, Kelly Dawe (UGA)  
494 for feedback on cellular phenotypes, Muthugapatti Kandasamy of the Biomedical  
495 Microscopy Core (UGA) for technical assistance with confocal microscopy, and  
496 Cassandra Extavour (Harvard) for providing technical advice and *Red* plasmids for  
497 RNAi. We also thank the Georgia Advanced Computing Resource Center (GACRC),  
498 Georgia Genomics and Bioinformatics Core (GGBC) and the Office of Research at the  
499 University of Georgia. This work was funded by the National Science Foundation (NSF)  
500 IOS-1354358 (AJM), and UGA CAES Undergraduate Research Award (ZS). RJS is a  
501 Pew Scholar in the Biomedical Sciences, supported by The Pew Charitable Trusts.

502 **References**

503

- 504 1. Falckenhayn C, Boerjan B, Raddatz G, Frohme M, Schoofs L, Lyko F.  
505 Characterization of genome methylation patterns in the desert locust *Schistocerca*  
506 *gregaria*. J Exp Biol. 2013;216: 1423–1429.
- 507 2. Cullen DA, Cease AJ, Latchininsky AV, Ayali A, Berry K, Buhl J, et al. From  
508 molecules to management: mechanisms and consequences of locust phase  
509 polyphenism. Adv In Insect Phys. 2017;53: 167–285.
- 510 3. Pegoraro M, Bafna A, Davies NJ, Shuker DM, Tauber E. DNA methylation changes  
511 induced by long and short photoperiods in *Nasonia*. Genome Res. 2016;26: 203–210.
- 512 4. Reynolds JA. Epigenetic influences on diapause. Adv In Insect Phys. 2017;53: 115–  
513 144.
- 514 5. Kozeretska IA, Serga SV, Koliada AK, Vaiserman AM. Epigenetic regulation of  
515 longevity in insects. Adv In Insect Phys. 2017;53: 87–114.
- 516 6. Bonasio R, Li Q, Lian J, Mutti NS, Jin L, Zhao H, et al. Genome-wide and caste-  
517 specific DNA methylomes of the ants *Camponotus floridanus* and *Harpegnathos*  
518 *saltator*. Curr Biol. 2012;22: 1755–1764.
- 519 7. Foret S, Kucharski R, Pellegrini M, Feng S, Jacobsen SE, Robinson GE, et al. DNA  
520 methylation dynamics, metabolic fluxes, gene splicing, and alternative phenotypes in  
521 honey bees. Proc Natl Acad Sci USA. 2012;109: 4968–4973.
- 522 8. Lockett GA, Kucharski R, Maleszka R. DNA methylation changes elicited by social  
523 stimuli in the brains of worker honey bees. Genes Brain Behav. 2012;11: 235–242.

- 524 9. Ford D. Honeybees and cell lines as models of DNA methylation and aging in  
525 response to diet. *Exp Gerontol.* 2013;48: 614–619.
- 526 10. He XJ, Zhou LB, Pan QZ, Barron AB, Yan WY, Zeng ZJ. Making a queen: an  
527 epigenetic analysis of the robustness of the honeybee (*Apis mellifera*) queen  
528 developmental pathway. *Mol Ecol.* 2017;26: 1598–1607.
- 529 11. Libbrecht R, Oxley PR, Keller L, Kronauer DJ. Robust DNA methylation in the  
530 clonal raider ant brain. *Curr Biol.* 2016;26: 391–395.
- 531 12. Bewick AJ, Vogel KJ, Moore AJ, Schmitz RJ. Evolution of DNA methylation across  
532 insects. *Mol Biol Evol.* 2016;34: 654–665.
- 533 13. Glastad KM, Arsenault SV, Vertacnik KL, Geib SM, Kay S, Danforth BN, et al.  
534 Variation in DNA methylation is not consistently reflected by sociality in  
535 Hymenoptera. *Genome Biol Evol.* 2017;9: 1687–1698.
- 536 14. Provataris P, Meusemann K, Niehuis O, Grath S, Misof M. Signatures of DNA  
537 methylation across insects suggest reduced DNA methylation levels in Holometabola.  
538 *Genome Biol Evol.* 2018;10: 1185–1197.
- 539 15. Glastad KM, Gokhale K, Liebig J, Goodisman MAD. The caste- and sex-specific  
540 DNA methylome of the termite *Zootermopsis nevadensis*. *Sci Rep.* 2016;6: 37110.
- 541 16. Lyko F, Foret S, Kucharski R, Wolf S, Falckenhayn C, Maleszka R. The honey bee  
542 epigenomes: differential methylation of brain DNA in queens and workers. *PLoS*  
543 *Biol.* 2010;8 :e1000506.
- 544 17. Xiang H, Zhu J, Chen Q, Dai F, Li X, Li M, et al. Single base-resolution methylome  
545 of the silkworm reveals a sparse epigenomic map. *Nat Biotechnol.* 2010;28: 516–520.

- 546 18. Wang X, Wheeler D, Avery A, Rago A, Choi JH, Colbourne JK, et al. Function and  
547 evolution of DNA methylation in *Nasonia vitripennis*. PLoS Genet. 2013;9:  
548 e1003872.
- 549 19. Cunningham CB, Ji L, Wiberg RA, Shelton J, McKinney EC, Parker DJ, et al. The  
550 genome and methylome of a beetle with complex social behavior, *Nicrophorus*  
551 *vespilloides* (Coleoptera: Silphidae). Genome Biol Evol. 2015;7: 3383–3396.
- 552 20. Patalano S, Vlasova A, Wyatt C, Ewels P, Camara F, Ferreira PG, et al. Molecular  
553 signatures of plastic phenotypes in two eusocial insect species with simple societies.  
554 Proc Natl Acad Sci USA. 2015;112: 13970–13975.
- 555 21. Rehan SM, Glastad KM, Lawson SP, Hunt BG. The genome and methylome of a  
556 subsocial small carpenter bee, *Ceratina calcarata*. Genome Biol Evol. 2016;8: 1401–  
557 1410.
- 558 22. Sarda S, Zeng J, Hunt BG, Yi SV. The evolution of invertebrate gene body  
559 methylation. Mol Biol Evol. 2012;29: 1907–1916.
- 560 23. Hunt BG, Glastad KM, Yi SV, Goodisman MAD. Patterning and regulatory  
561 associations of DNA methylation are mirrored by histone modifications in insects.  
562 Genome Biol Evol. 2013;5: 591–598.
- 563 24. Li-Byarlay H, Li Y, Stroud H, Feng S, Newman TC, Kaneda M, et al. RNA  
564 interference knockdown of DNA methyl-transferase 3 affects gene alternative  
565 splicing in the honey bee. Proc Natl Acad Sci USA. 2013;110: 12750–12755.
- 566 25. Chipman AD. *Oncopeltus fasciatus* as an evo-devo research organism. Genesis.  
567 2017;55.

- 568 26. Panfilio KA, Vargas Jentsch IM, Benoit JB, Erezyilmaz D, Suzuki Y, Colella S, et  
569 al. Molecular evolutionary trends and feeding ecology diversification in the  
570 Hemiptera, anchored by the milkweed bug genome; 2017. Preprint. Available from:  
571 doi:<https://doi.org/10.1101/201731>. Cited 26 June 2018.
- 572 27. Liu PZ, Kaufman TC. Hunchback is required for suppression of abdominal identity,  
573 and for proper germband growth and segmentation in the intermediate germband  
574 insect *Oncopeltus fasciatus*. *Development*. 2004;131: 1515–1527.
- 575 28. Bewick AJ, Hofmeister BT, Lee K, Zhang X, Hall DW, Schmitz RJ. FASTmC: A  
576 suite of predictive models for nonreference-based estimations of DNA methylation.  
577 *G3 (Bethesda)*. 2015;6: 447–752.
- 578 29. Bonhag PF, Wick JR. The functional anatomy of the male and female reproductive  
579 systems of the milkweed bug, *Oncopeltus fasciatus* (Dallas) (Heteroptera:  
580 Lygaeidae). *J Morphol*. 1953;93: 177–283.
- 581 30. Vaughn JP, Dijkwel PA, Mullenders LH, Hamlin JL. Replication forks are associated  
582 with the nuclear matrix. *Nucleic Acids Res*. 1990;18: 1965–1969.
- 583 31. Drinnenberg IA, deYoung D, Henikoff S, Malik HS. Recurrent loss of CenH3 is  
584 associated with independent transitions to holocentricity in insects. *eLife*. 2014;doi:  
585 10.7554/eLife.03676.
- 586 32. Jones P, Binns D, Chang HY, Fraser M, Li W, McAnulla C, et al. InterProScan 5:  
587 genome-scale protein function classification. *Bioinformatics*. 2014;30: 1236–1240.
- 588 33. Mirarab S, Nguyen N, Guo S, Wang LS, Kim J, Warnow T. PASTA: ultra-large  
589 multiple sequence alignment for nucleotide and amino-acid sequences. *J Comput*  
590 *Biol*. 2015;22: 377–386.

- 591 34. Maddison WP, Maddison DR. Mesquite: a modular system for evolutionary analysis.  
592 Version 3.31. 2017;<http://mesquiteproject.org>.
- 593 35. Bouckaert R, Heled J, Kühnert D, Vaughan T, Wu CH, Xie D. et al. BEAST 2: a  
594 software platform for Bayesian evolutionary analysis. PLoS Comput. Biol. 2014;**10**:  
595 e1003537.
- 596 36. Ewen-Campen B, Jones TE, Extavour CG. Evidence against a germplasm in the  
597 milkweed bug *Oncopeltus fasciatus*, a hemimetabolous insect. Biol Open. 2013;2:  
598 556–568.
- 599 37. Cunningham CB, Douthit MK, Moore AJ. Octopaminergic gene expression and  
600 flexible social behaviour in the subsocial burying beetle *Nicrophorus vespilloides*.  
601 Insect Mol Biol. 2014;23: 391–404.
- 602 38. Livak KJ, Schmittgen TD. Analysis of relative gene expression data using real-time  
603 quantitative PCR and the 2(-Delta Delta C(T)) Method. Methods. 2001;25: 402–408.
- 604 39. Urich MA, Nery JR, Lister R, Schmitz RJ, Ecker JR. MethylC-seq library preparation  
605 for base-resolution whole-genome bisulfite sequencing. Nat Protoc. 2015;10: 475–  
606 483.
- 607 40. Cokus SJ, Feng S, Zhang X, Chen Z, Merriman B, Haudenschild CD, et al. Shotgun  
608 bisulphite sequencing of the *Arabidopsis* genome reveals DNA methylation  
609 patterning. Nature. 2008;452: 215–219.
- 610 41. Lister R, O'Malley RC, Tonti-Filippini J, Gregory BD, Berry CC, Millar AH, et al.  
611 Highly integrated single-base resolution maps of the epigenome in *Arabidopsis*. Cell.  
612 2008;133: 523–536.

- 613 42. Herb BR, Wolschin F, Hansen KD, Aryee MJ, Langmead B, Irizarry R, et al.  
614 Reversible switching between epigenetic states in honeybee behavioral subcastes. *Nat*  
615 *Neurosci.* 2012;15: 1371–1373.
- 616 43. Asselman J, De Coninck DIM, Pfrender ME, De Schamphelaere KAC. Gene body  
617 methylation patterns in *Daphnia* are associated with gene family size. *Genome Biol*  
618 *Evol.* 2016;8: 1185–1196.
- 619 44. Schultz MD, He Y, Whitaker JW, Hariharan M, Mukamel EA, Leung D, et al.  
620 Human body epigenome maps reveal noncanonical DNA methylation variation.  
621 *Nature.* 2015;523: 212–216.
- 622 45. Martin M, Marcel M. Cutadapt removes adapter sequences from high-throughput  
623 sequencing reads. *EMBnet J.* 2011;17: 10–12.
- 624 46. Langmead B, Trapnell C, Salzberg SL. Ultrafast and memory-efficient alignment of  
625 short DNA sequences to the human genome. *Genome Biol.* 2009;10: R25.
- 626 47. Schultz MD, Schmitz RJ, Ecker JR. 'Leveling' the playing field for analyses of single-  
627 base resolution DNA methylomes. *Trends Genet.* 2012;28: 583–585.
- 628 48. Takuno S, Gaut BS. Body-methylated genes in *Arabidopsis thaliana* are functionally  
629 important and evolve slowly. *Mol Biol Evol.* 2012;1: 219–227.
- 630 49. Niederhuth CE, Bewick AJ, Ji L, Alabady MS, Kim KD, Li Q, et al. Widespread  
631 natural variation of DNA methylation within angiosperms. *Genome Biol.* 2016;17:  
632 194.
- 633 50. Vleurinck C, Raub S, Sturgill D, Oliver B, Beye M. Linking genes and brain  
634 development of honeybee workers: a whole-transcriptome approach. *PLoS One.*  
635 2016;11: e0157980.



- 636 51. Bolger AM, Lohse M, Usadel B. Trimmomatic: a flexible trimmer for Illumina  
637 sequence data. *Bioinformatics*. 2014;30: 2114–2120.
- 638 52. Kim D, Pertea G, Trapnell C, Pimentel H, Kelley R, Salzberg SL. TopHat2: accurate  
639 alignment of transcriptomes in the presence of insertions, deletions and gene fusions.  
640 *Genome Biol*. 2013;14: R36.
- 641 53. Robinson MD, McCarthy DJ, Smyth GK. edgeR: a Bioconductor package for  
642 differential expression analysis of digital gene expression data. *Bioinformatics*.  
643 2010;26: 139–140.
- 644 54. Chen Y, Lun ATL, Smyth GK. From reads to genes to pathways: differential  
645 expression analysis of RNA-Seq experiments using Rsubread and the edgeR quasi-  
646 likelihood pipeline. *F1000Res*. 2016;5: 1438.
- 647 55. Götz S, García-Gómez JM, Terol J, Williams TD, Nagaraj SH, Nueda MJ, et al.  
648 High-throughput functional annotation and data mining with the Blast2GO suite.  
649 *Nucleic Acids Res*. 2008;36: 3420–3435.
- 650 56. Alexa A, Rahnenfuhrer J. topGO: Enrichment analysis for gene ontology. R package  
651 version 2.30.0. 2016.
- 652 57. Langmead B, Salzberg S. Fast gapped-read alignment with Bowtie 2. *Nat Methods*.  
653 2012;9: 357–359.
- 654 58. Quinlan AR, Hall IM. BEDTools: a flexible suite of utilities for comparing genomic  
655 features. *Bioinformatics*. 2010;26: 841–842.

656 **Supporting Information**

657

658 **S1 Fig. Identification of *O. fasciatus* DNA methyltransferases.** (A) Phylogenetic  
659 relationship of DNA methyltransferases identified the *de novo* (*Dnmt3*) and maintenance  
660 (*Dnmt1*) DNA methyltransferase in *O. fasciatus*. Node support with  $\leq 0.5$  posterior  
661 probability is indicated – other nodes are  $\geq 0.95$ . Branch lengths are in amino acid  
662 substitutions per site. Species names are represented as abbreviations: Acy. pis.:  
663 *Acyrtosiphon pisum*, Aed. aeg.: *Aedes aegypti*, Aed. alb.: *Aedes albopictus*, Ano. gam.:  
664 *Anopheles gambiae*, Api. mel.: *A. mellifera*, Bom. mor.: *Bo. mori*, Cam. flo.:  
665 *Camponotus floridanus*, Cop. flo.: *Copidosoma floridanum*, Cul. qui.: *Culex pipiens*  
666 *quinquefasciatus*, Dro. mel.: *Drosophila melanogaster*, Har. sal.: *Harpegnathos saltator*,  
667 Mic. dem.: *Microplitis demolitor*, Nas. vit.: *Nasonia vitripennis*, Nic. ves.: *Nicrophorus*  
668 *vespilloides*, Onc. fas.: *O. fasciatus*, Cer. bir.: *Ooceraea (Cerapachys) biroi*, Pol. can.:  
669 *Polistes canadensis*, Pol. dom.: *Polistes dominula*, Sol. inv.: *Solenopsis invicta*, Tri. cas.:  
670 *Tribolium castaneum*, and Zoo. nev.: *Z. nevadensis*. (B) A to scale representation of  
671 *Dnmt1* and protein domains identified in *O. fasciatus* and *M. musculus*.

672

673 **S2 Fig. DNA methylation consequences following post-transcriptional knockdown of**  
674 ***Dnmt1* are restricted to ovaries.** (A) Assessment of RNAi treatment targeting *Dnmt1*  
675 using qRT-PCR demonstrates successful reduction in transcription compared to control  
676 across all tissues sampled. Colored dots indicate independent biological replicates. (B)  
677 Genome-wide CG methylation level across tissues sampled. Numbers at the top of each  
678 bar corresponds to independent biological replicates.

679

680 **S3 Fig. Eggs laid in *O. fasciatus* ds-dnmt1 and control females.** (A) Number of eggs  
681 laid by ds-dnmt1 and control females 8-days post-injection. Dots indicate mean  
682 expression level, and error bars indicate standard error of the mean.

683

684 **S4 Fig. mCG in *A. mellifera* and *Z. nevadensis* is not associated with transcription.**

685 (A) Gene expression level for deciles of increasing mCG (1–10) and un-methylated genes  
686 (UM). Error bars represent 95% confidence interval of the mean. (B) Regression of gene  
687 expression against a continuous measure of mCG among all genes with >0 FPKM and  
688 weighted mCG. Raw *p* values are provided for each regression, and significance (S) or  
689 non-significance (NS) is indicated in brackets following Bonferroni correction.

690

691 **S5 Fig. Loss of mCG in *O. fasciatus* ovaries has a limited effect on transcription.** (A)

692 Combinational overlap of genes that are differential CG-methylated and expressed, and  
693 similarly CG-methylated and expressed between *O. fasciatus* ds-dnmt1 and control. Gene  
694 groups: Differentially Methylated Gene (DMG), Differentially Expressed Gene (DEG),  
695 Similarly Methylated Gene (SMG)/UnMethylated Genes (UMG), and non-Differentially  
696 Expressed Gene (non-DEG). More stringent thresholds were used to group genes as CG-  
697 methylated or unmethylated (see **Materials and Methods**).

698

699 **S6 Fig. DNA methylation of TEs in *O. fasciatus*.** (A) Levels of mCG across the bodies

700 and 1kb flanking sequence of different annotated TEs in *O. fasciatus*.

701

702 **S1 Table. PCR primers used to validate the presence of a single *Dnmt1* ortholog in**  
703 **the *O. fasciatus* genome.**

704

705 **S2 Table. Primer sequences for use in producing template DNA for use in the**  
706 **MegaScript transcription kit to generate double stranded RNAs for injection and**  
707 **for quantitative real-time PCR to assess expression levels of *Dnmt1*.**

708

709 **S3 Table. Overlap between *O. fasciatus* (control) CG-methylated and unmethylated**  
710 **genes in none and  $\geq 1$  other insect species used in this study.**

711

712 **S4 Table. DNA methylation summary statistics for all species investigated in this**  
713 **study.**

714

715 **S5 Table. Output from edgeR v3.20.1 [53] with gene expression (Fragments Per**  
716 **Kilobase of transcript per Million mapped reads [FPKM]) for *O. fasciatus* ovaries**  
717 ***ds-dnmt1* and control biological and technical replicates.**

718

719 **S6 Table. Gene expression FPKM for *A. mellifera* queen and drone brains.**

720

721 **S7 Table. Gene expression (FPKM) for *Z. nevadensis* female worker at the final**  
722 **instar larva.**

723

724 **S8 Table. Output from edgeR v3.20.1 [53] with gene expression (FPKM) for *O.***  
725 ***fasciatus* gut, head, and thorax ds-*dnmt1* and control biological replicates.**

726

727 **S9 Table. Output General Features File (GFF) from RepeatMasker v4.0.5**  
728 **(<http://www.repeatmasker.org>).**

729

730 **S10 Table. Significance (*p* value) of TE expression between ds-*dnmt1* and control**  
731 **tissues.**

732

733 **S11 Table. Gene Ontology (GO) terms for *O. fasciatus* v1.1 reference genome**  
734 **assembly [26] annotated genes.**

735

736 **S12 Table. Significantly enriched GO terms for the intersections between**  
737 **Differentially Methylated Genes (DMG), Similarly Methylated Genes (SMG),**  
738 **Differentially Expressed Genes (DEG), and non-Differentially Expressed Genes**  
739 **(non-DEG).**

740

741 **S1 Data. Unaligned and aligned DNA methyltransferase protein sequences in fasta**  
742 **format, and a parenthetical phylogenetic tree in nexus format estimated from the**  
743 **aligned DNA methyltransferase protein sequences using BEAST v2.3.2 [35].**

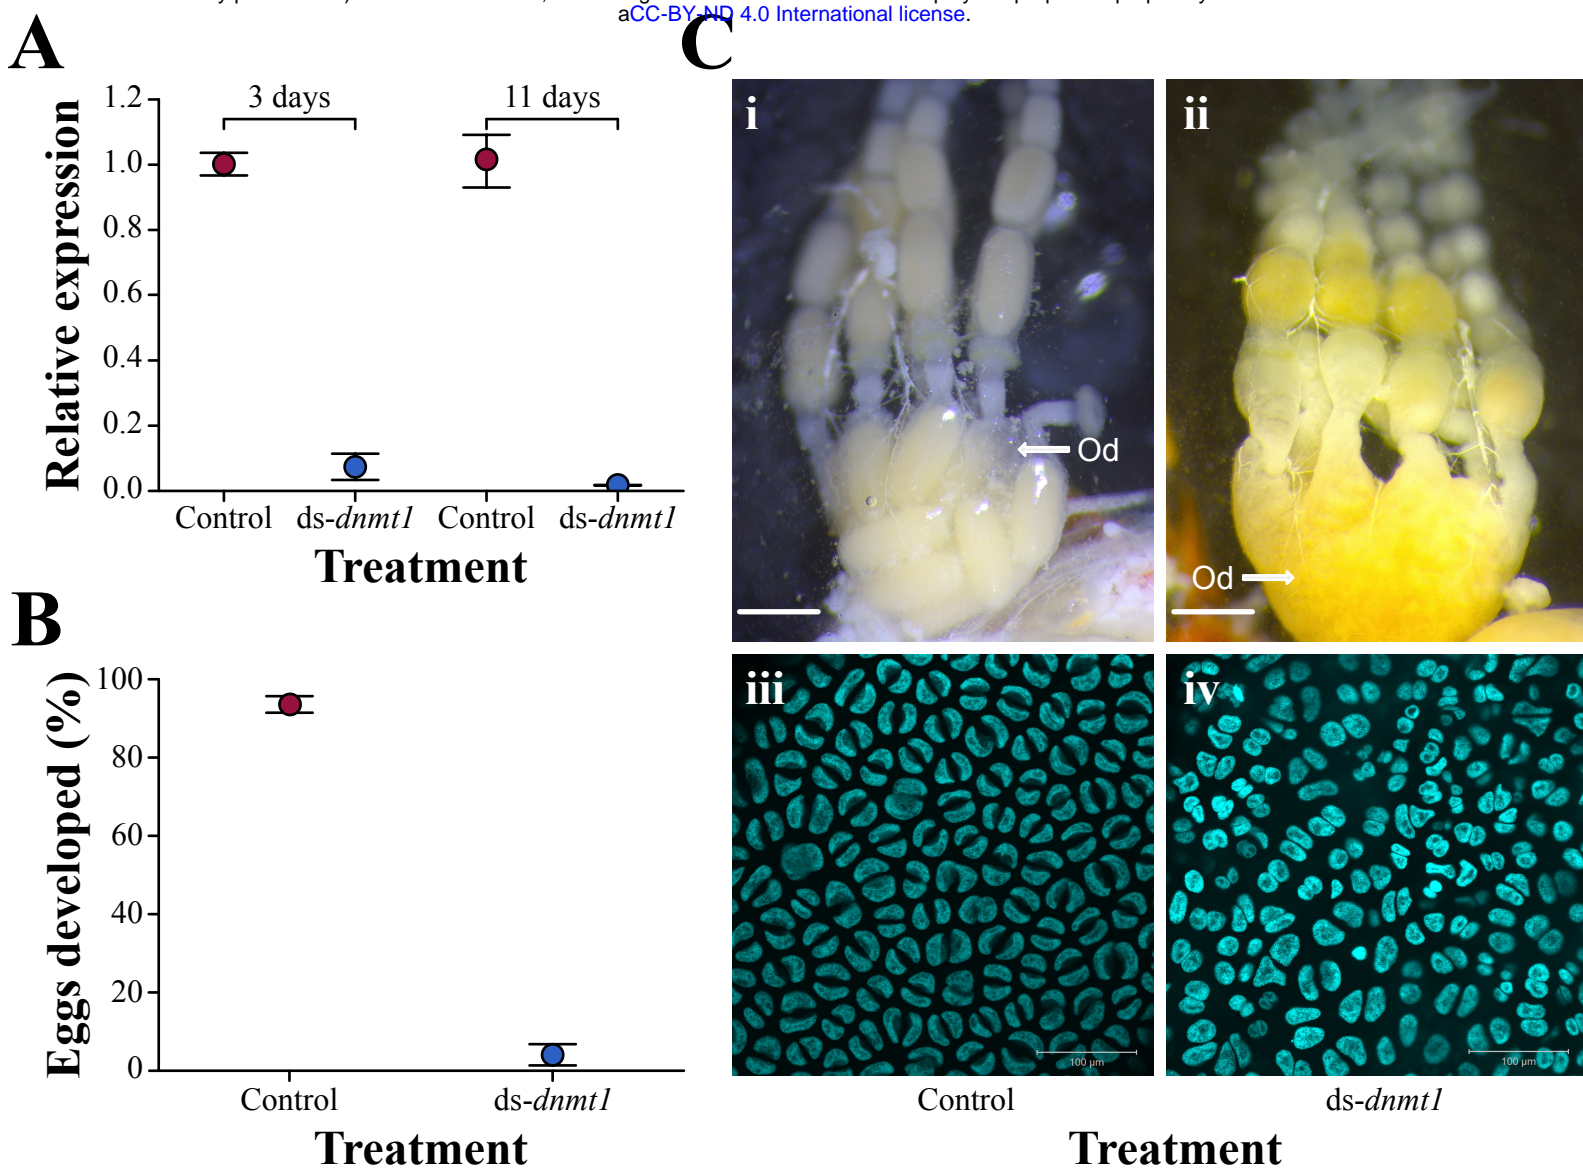

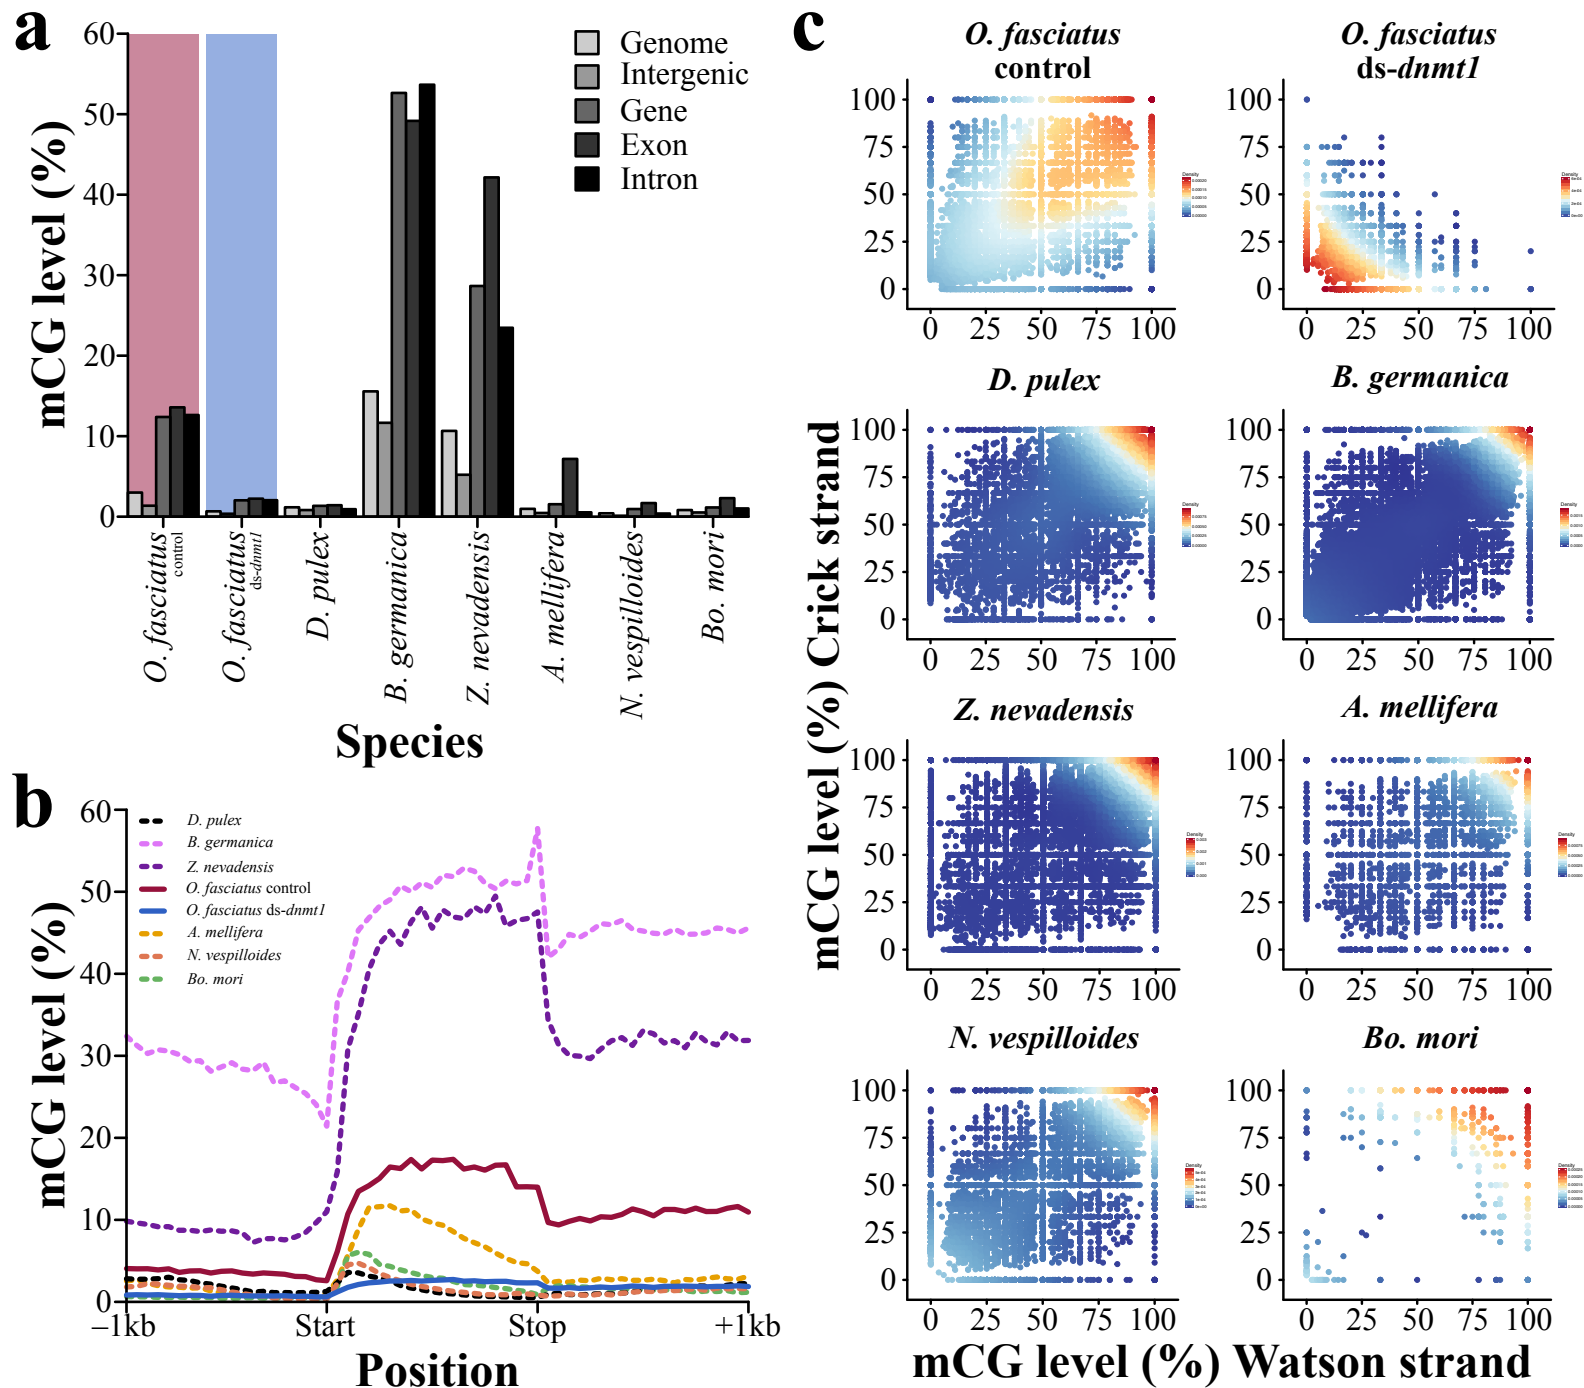



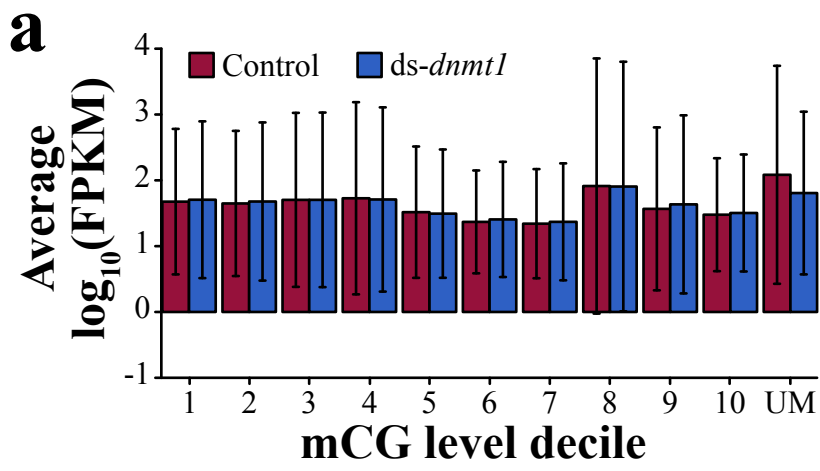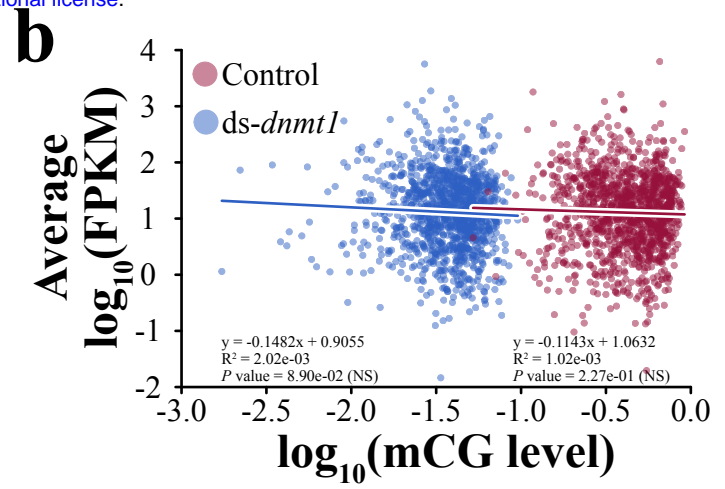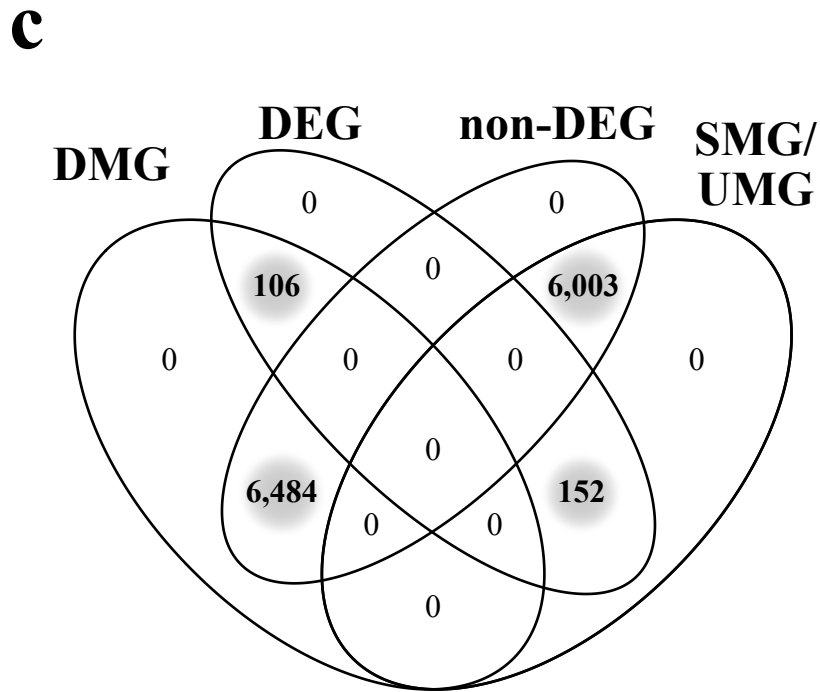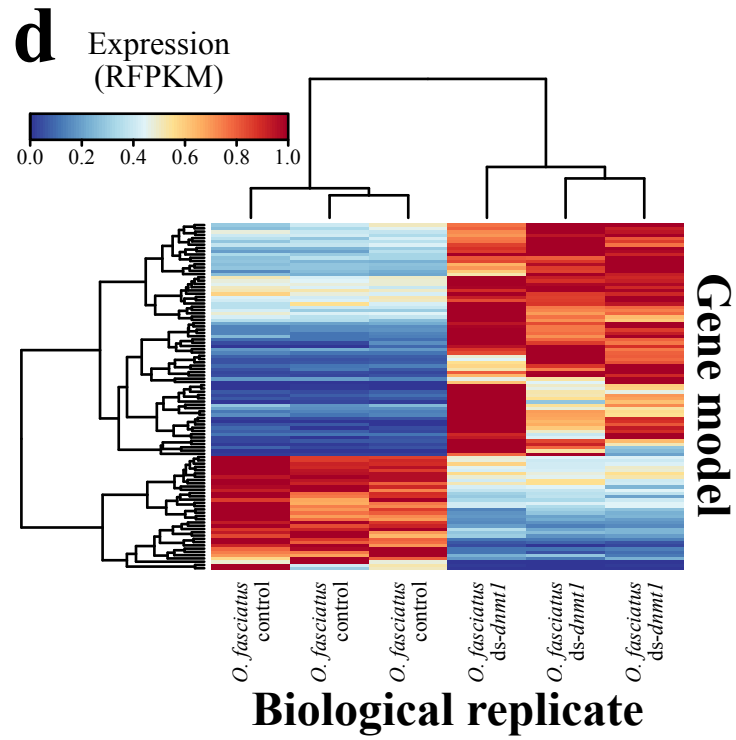



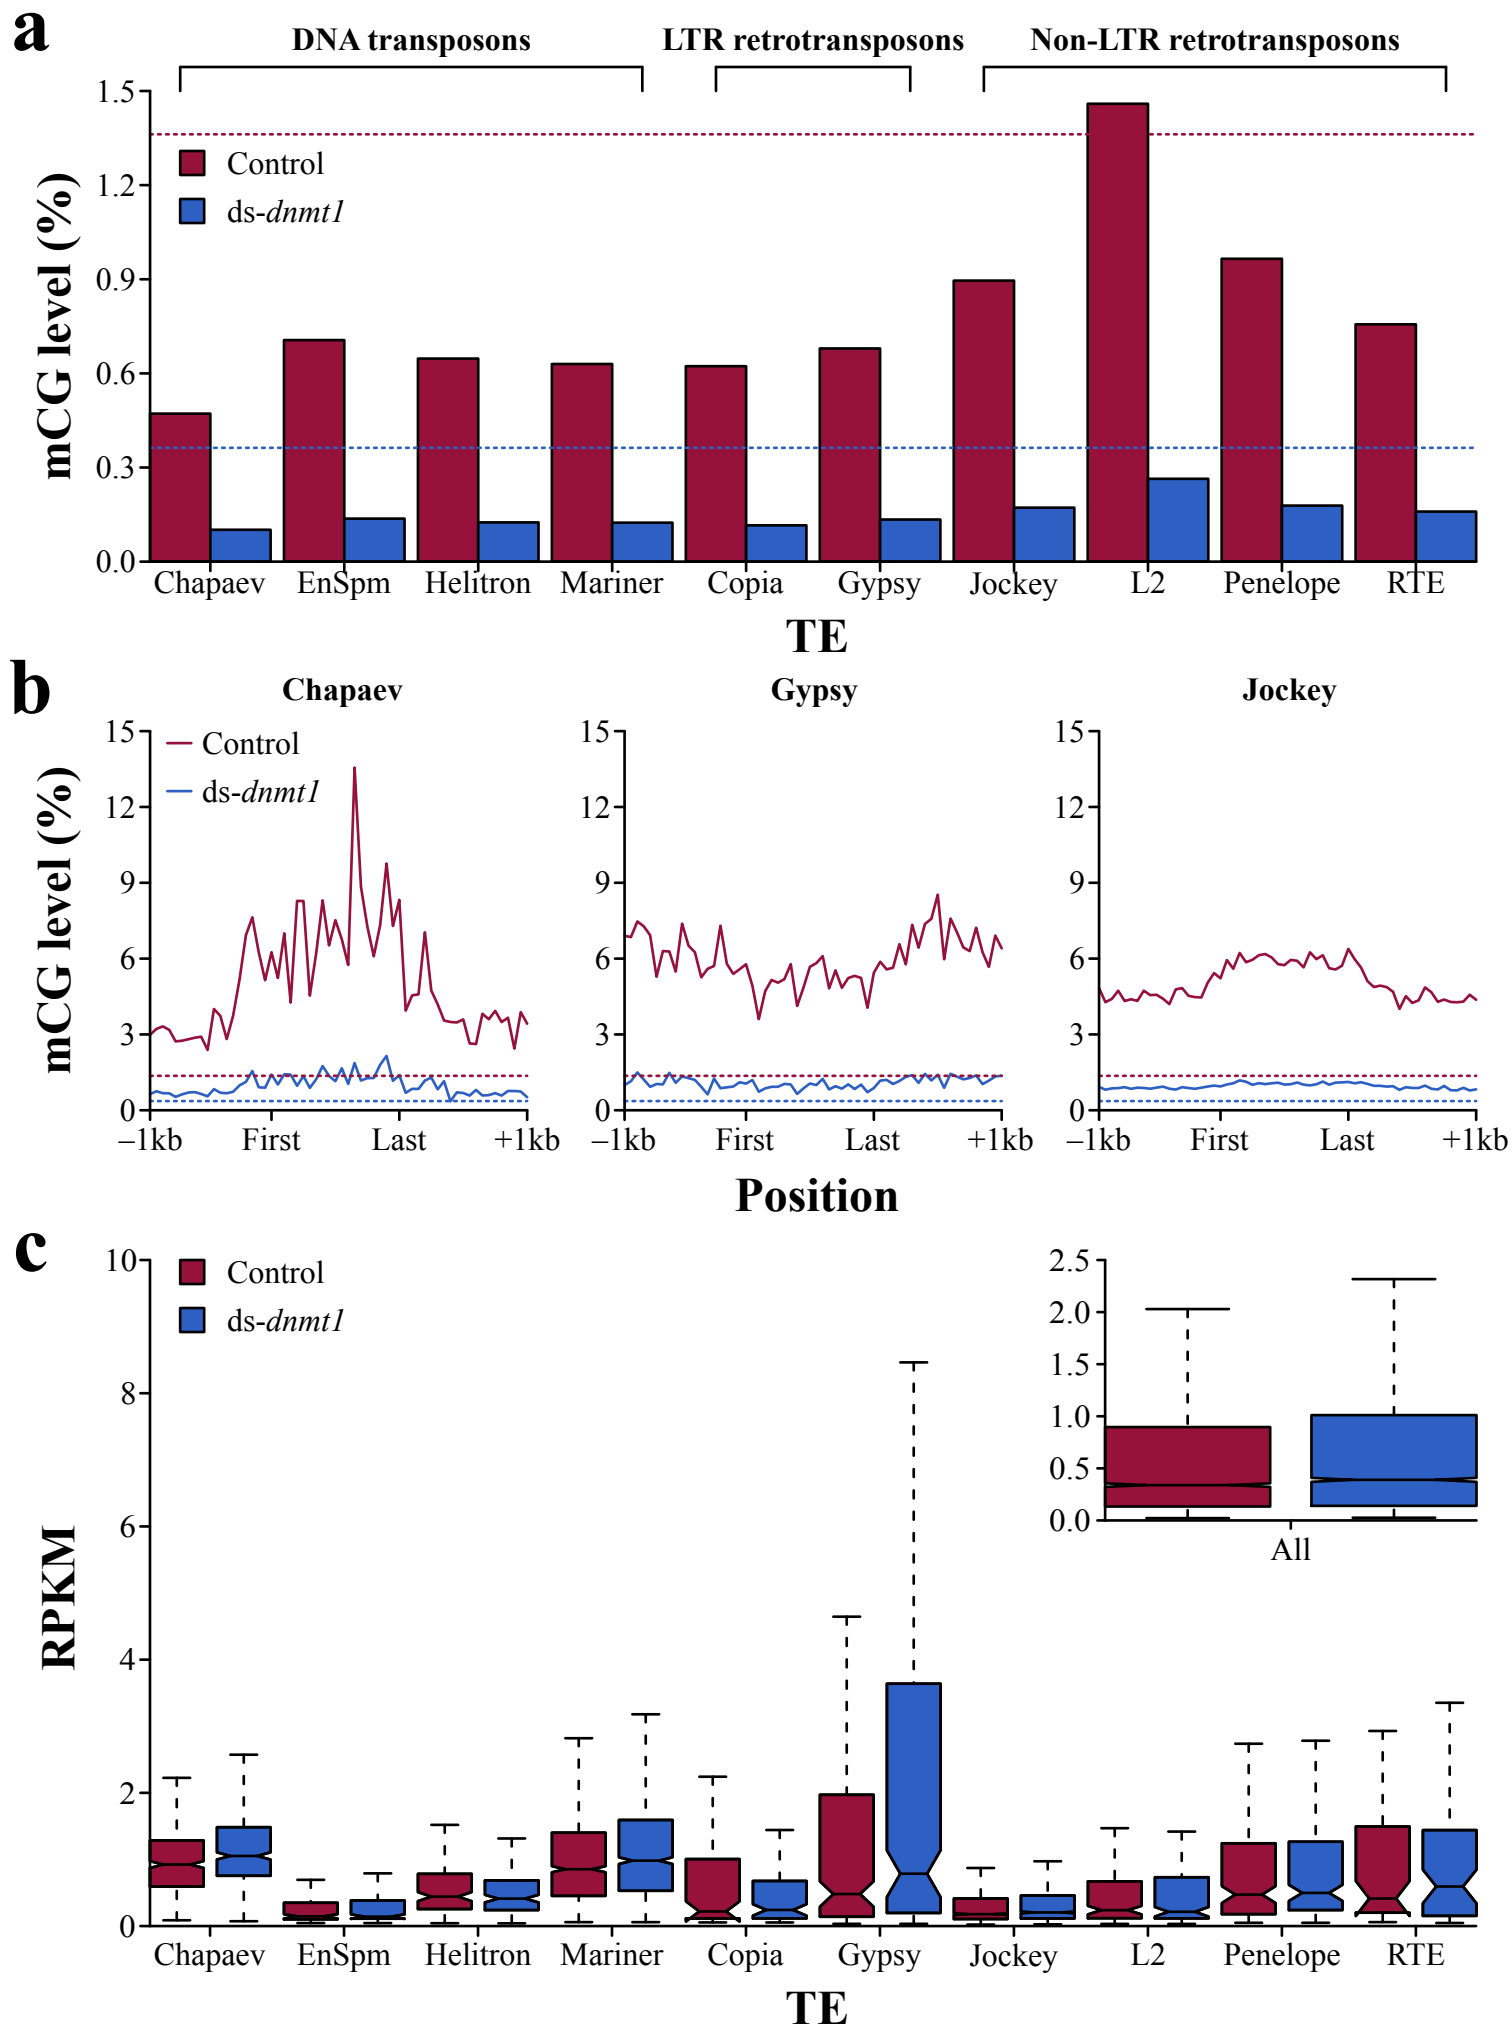

Source: https://www.biorxiv.org/content/10.1101/355669v2.full.pdf
